# Supplementary material
Source: ML conference proceedings conference paper supplement (https://openreview.net/forum?id=ogk236hsJM)
Supplement: supplementary_material [file attachment]

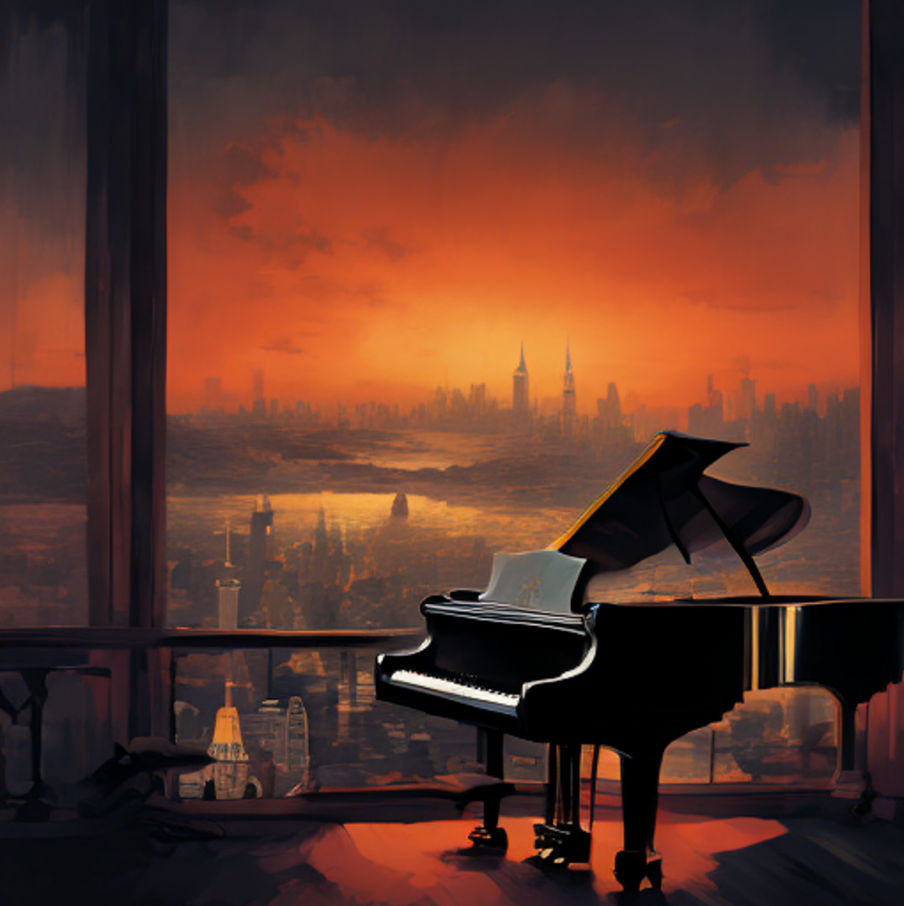

“A silhouette of a **grand piano** overlooking a **dusky city scape** viewed from a **top-floor pent house**, rendered in the bold and vivid style of a **vintage travel poster**”

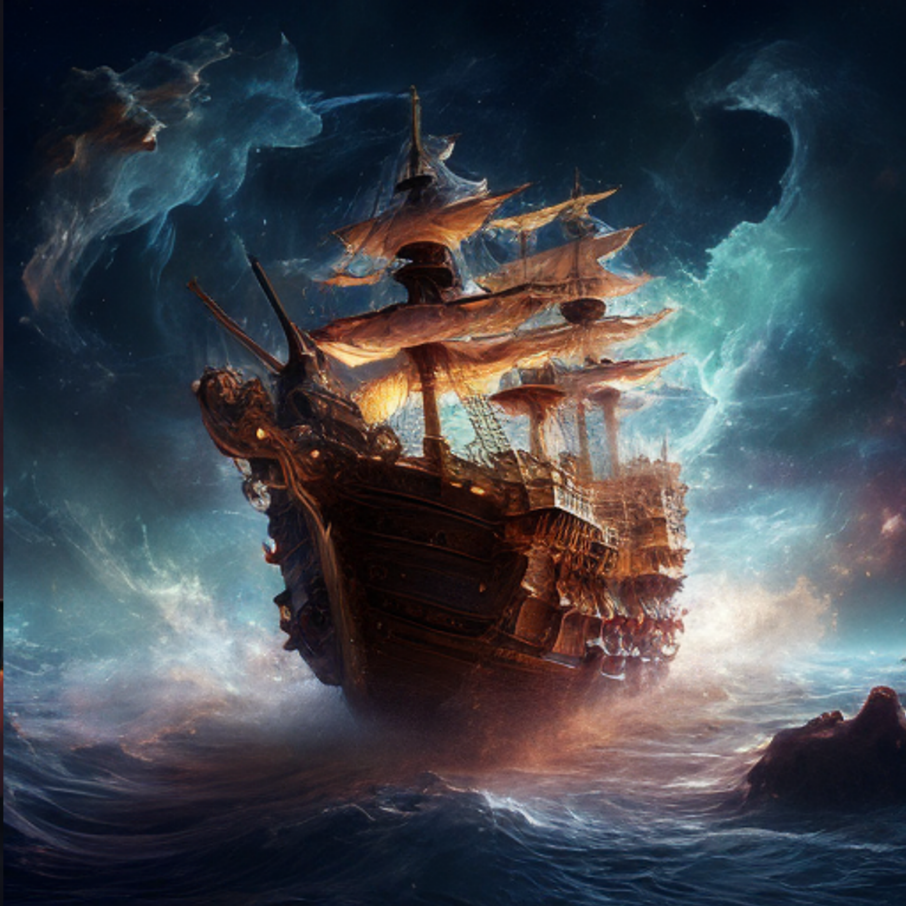

“**Pirate ship** trapped in a **cosmic maelstrom nebula**, rendered in cosmic beach whirlpool engine, volumetric lighting, spectacular, ambient lights, light pollution, cinematic atmosphere, art nouveau style, illustration art artwork by SenseiJaye, intricate detail.”

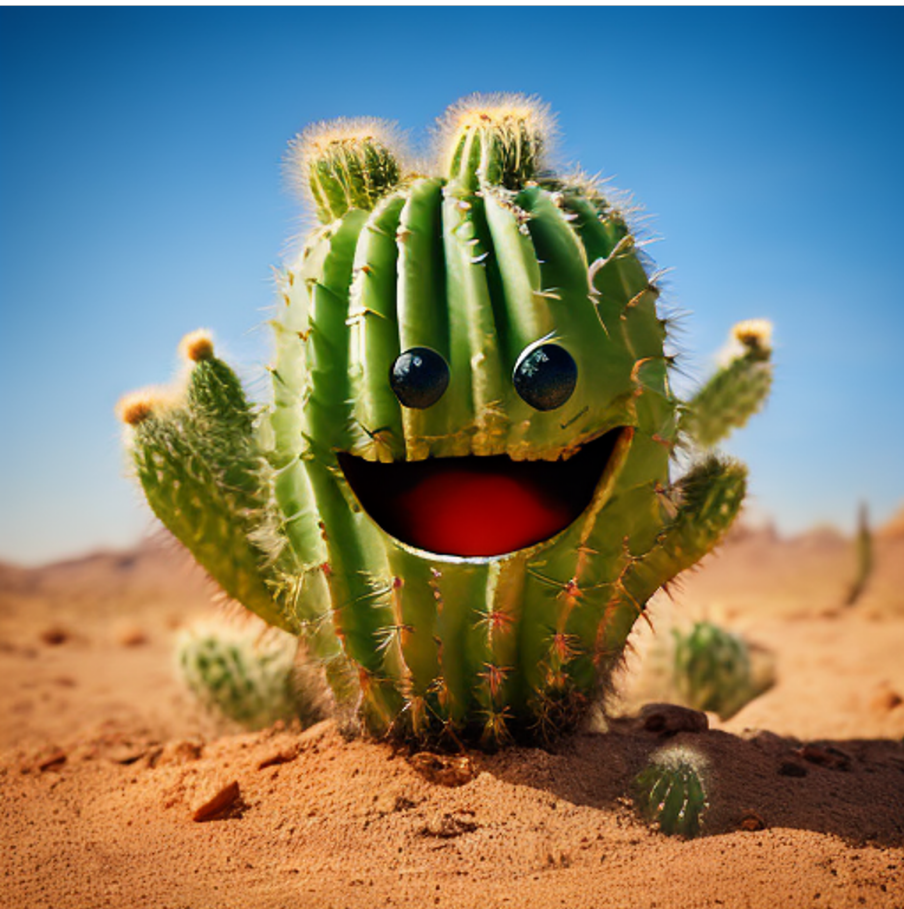

“A small **cactus** with a **happy face** in the **Sahara desert**.”

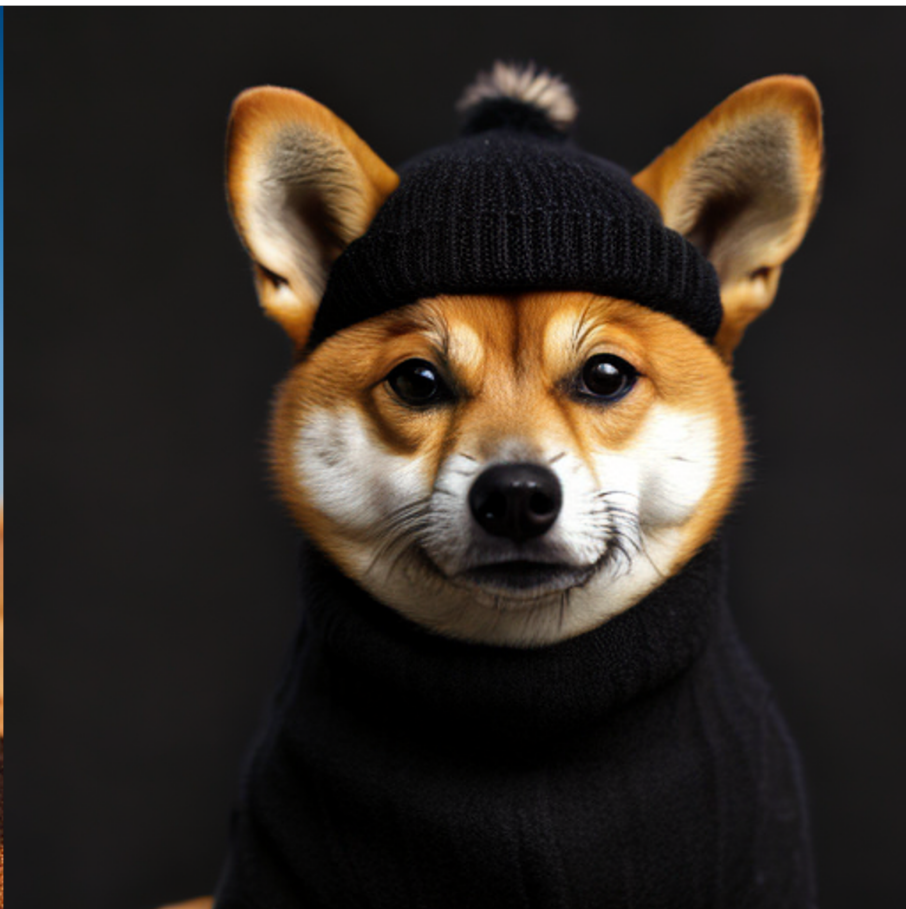

“A **Shiba Inu** dog wearing a **beret** and **black turtleneck**.”

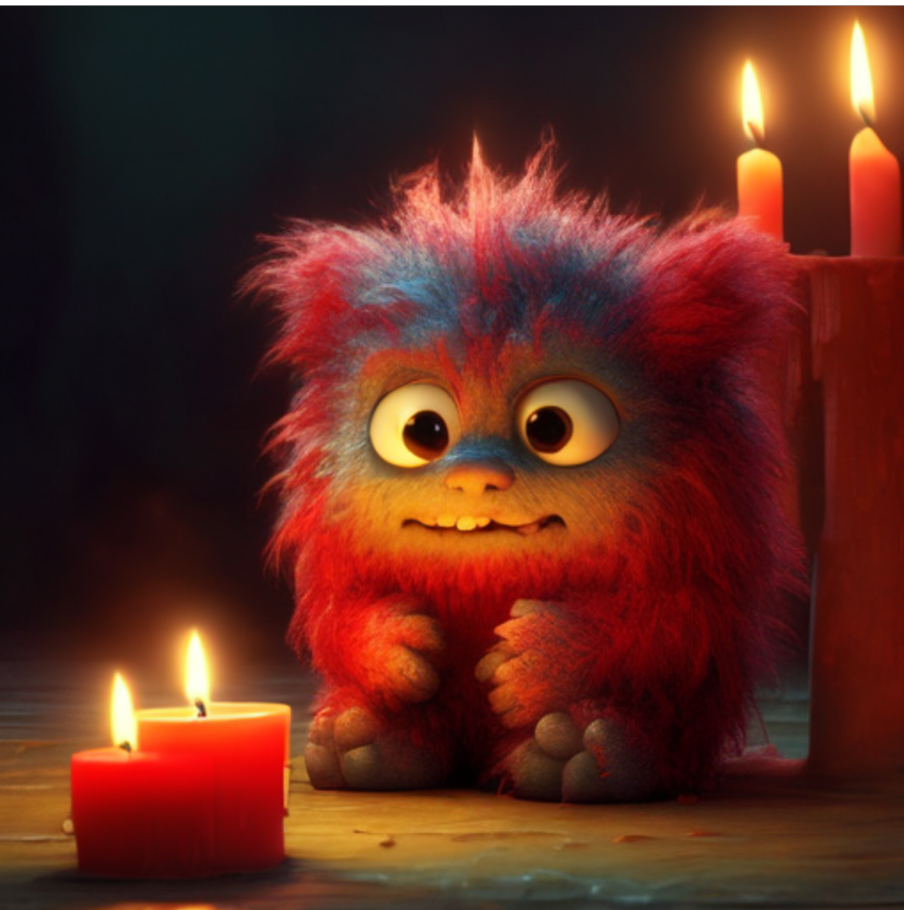

“Animated scene features a close-up of a **short fluffy monster** kneeling beside a **melting red candle**. The art style is **3D and realistic**, with a focus on lighting and texture. The mood of the painting is one of **wonder** and **curiosity**, as the monster **gazes at the flame** with **wide eyes** and open mouth. Its pose and **expression** convey **a sense of innocence** and **playfulness**, as if it is **exploring** the world around it **for the first time**. The use of **warm colors** and dramatic lighting further enhances the cozy atmosphere of the image.”

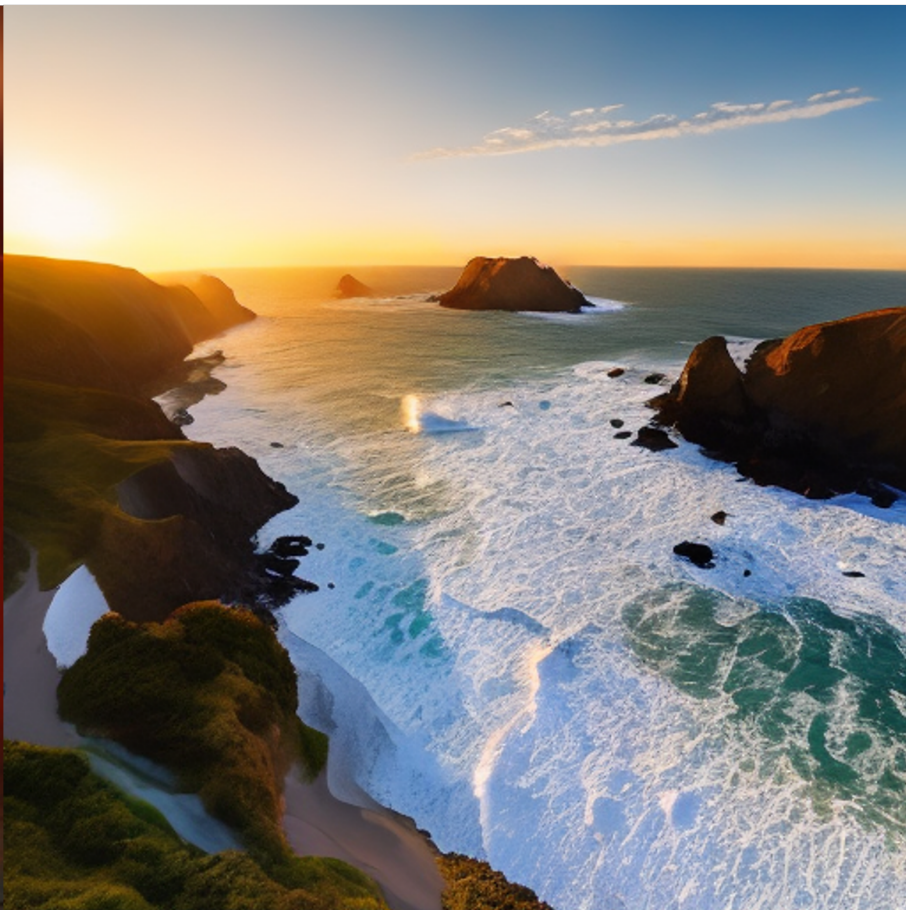

“Drone view of **waves** crashing against the **rugged cliffs** along **Big Sur's garay point beach**. The crashing **blue waters** create **white-tipped waves**, while the **golden light** of the setting **sun illuminates** the **rocky shore**. A **small island** with a lighthouse sits in the distance, and **green shrubbery** covers the cliff's edge. The steep drop from the road down to the beach is a dramatic feat, with the cliff's edges jutting out over the sea. This is a view that captures the **raw beauty** of the **coast** and the **rugged landscape** of the Pacific Coast Highway.”
