# Supplementary material
Source: ML conference proceedings conference paper supplement (https://openreview.net/forum?id=ogk236hsJM)
Supplement: supplementary_material [file attachment]

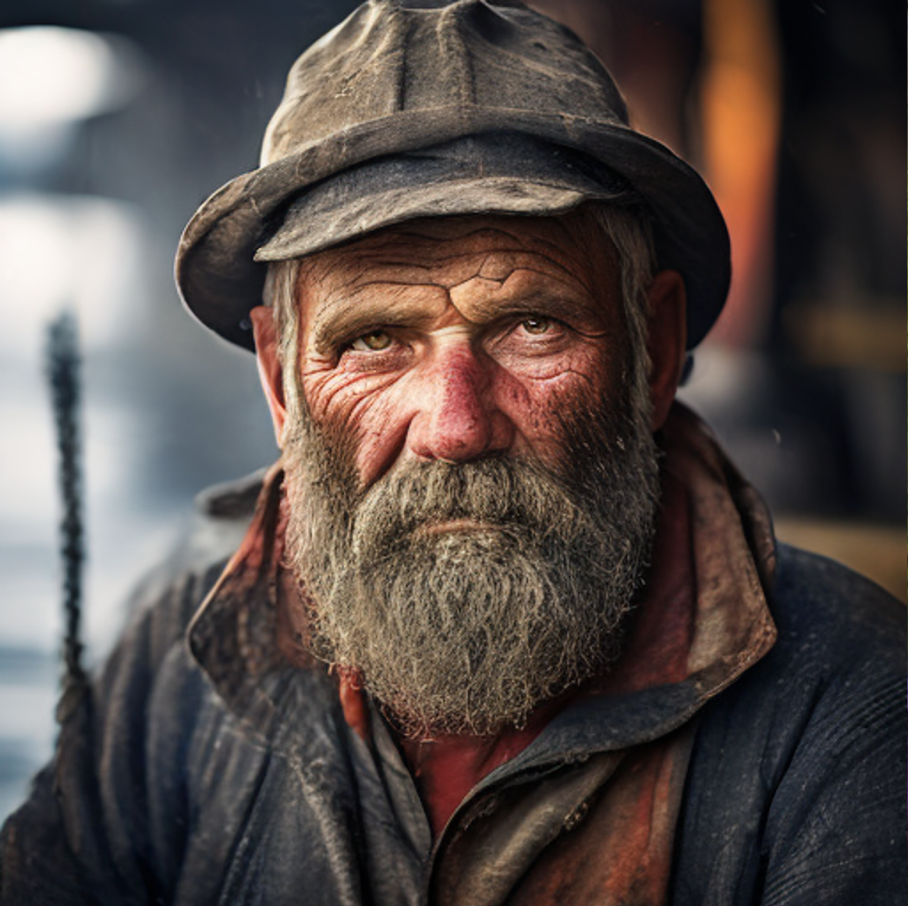

“Seasoned fisherman portrait, weathered skin etched with deep wrinkles, white beard, piercing gaze beneath a fisherman’s hat, softly blurred dock background accentuating rugged features, captured under natural light, ultra-realistic, high dynamic range photo.”

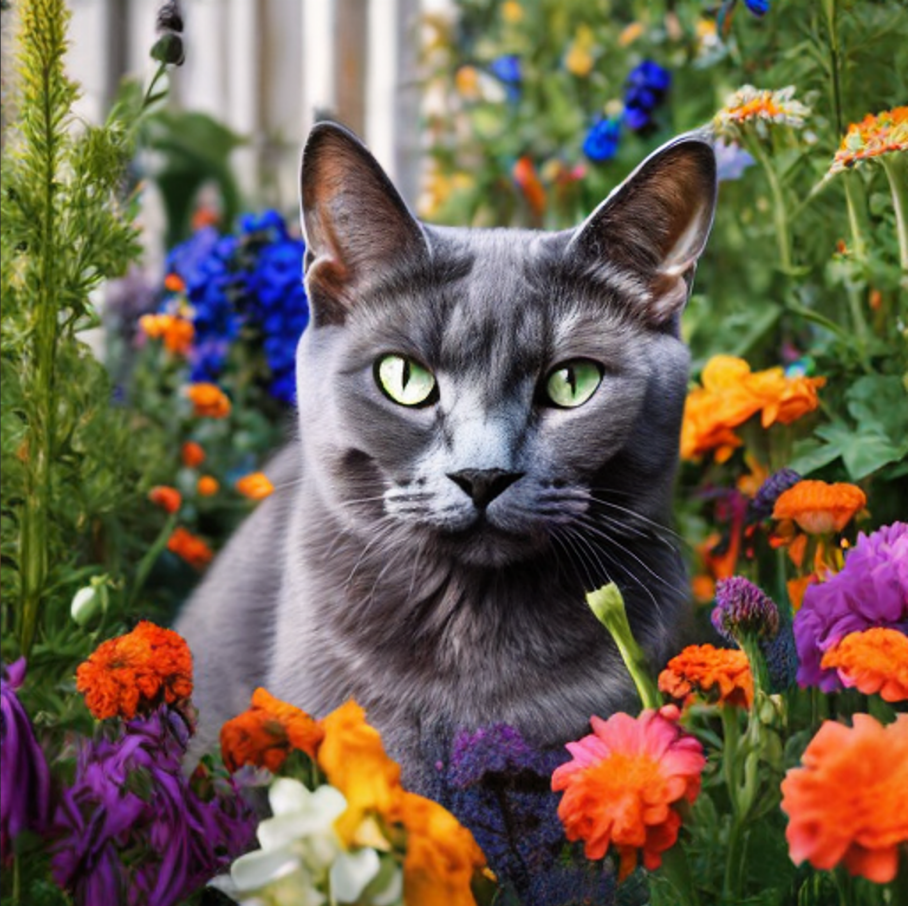

“Russian Blue cat exploring a garden, surrounded by vibrant flowers.”

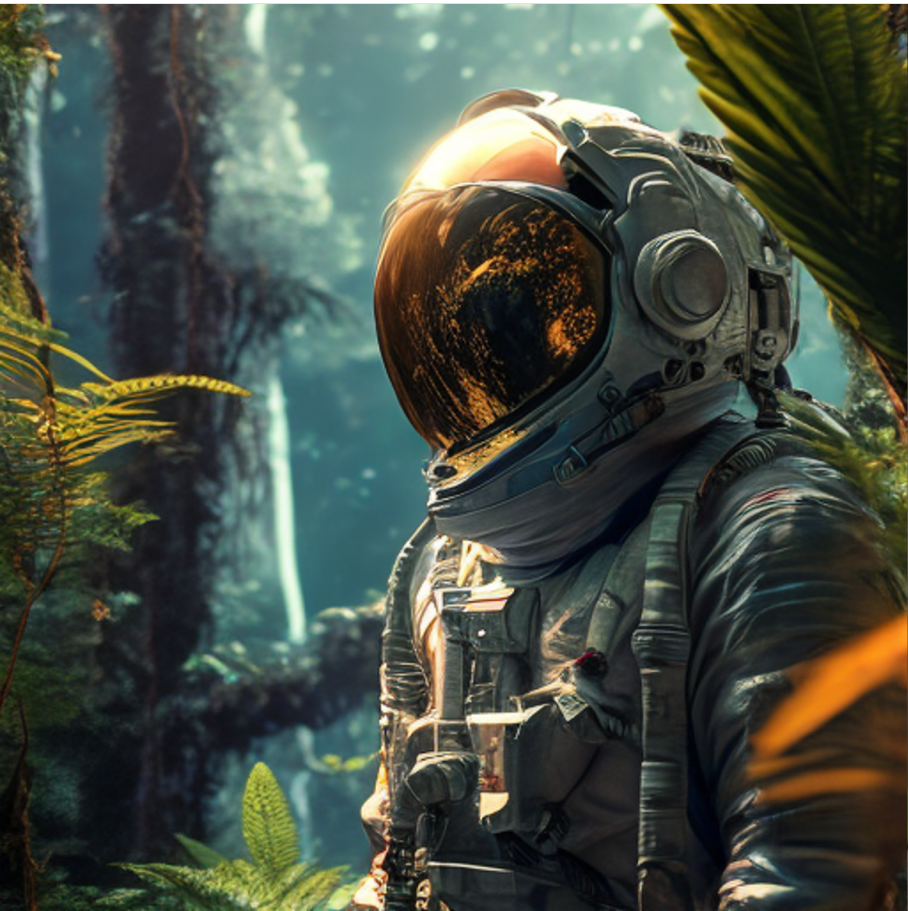

“Astronaut in a jungle, cold color palette, muted colors, detailed, 8k. ”

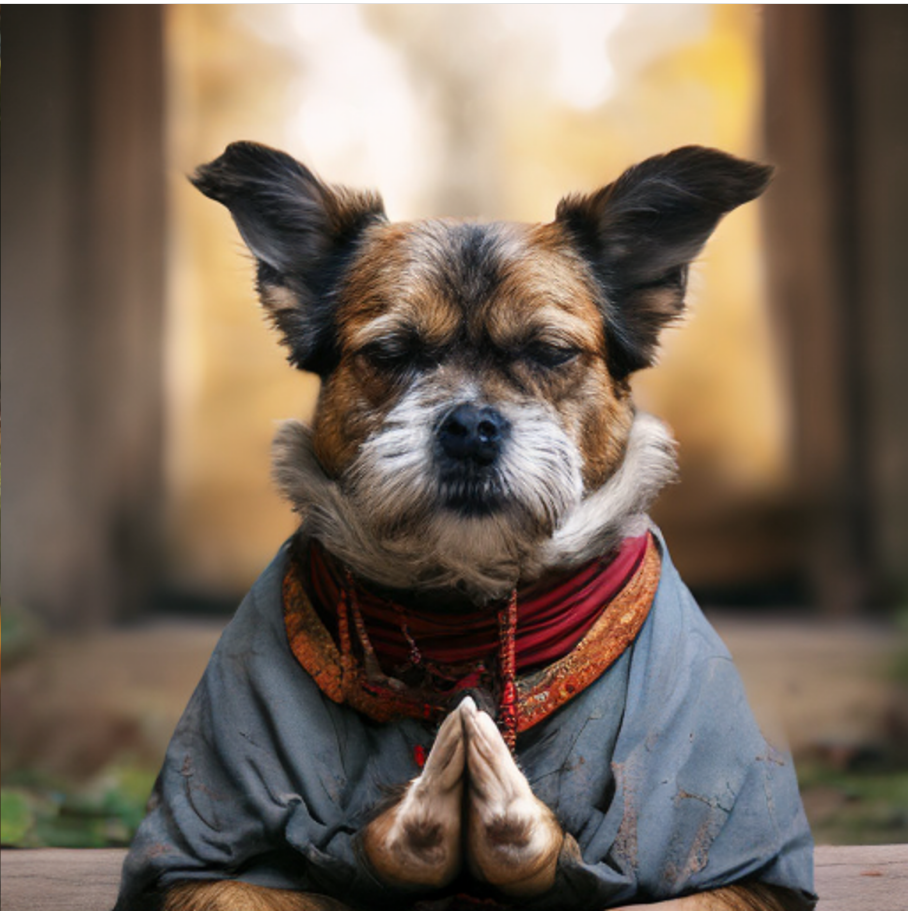

“A dog that has been meditating all the time.”

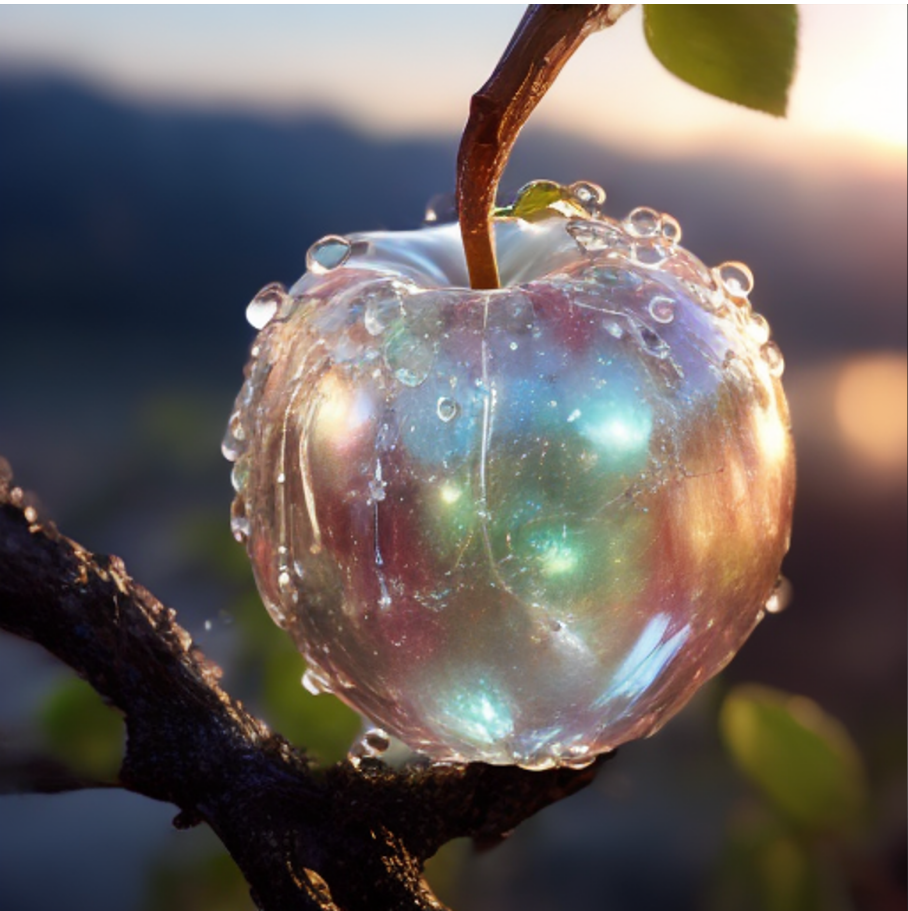

“A delicate apple(universe of stars inside the apple) made of opal hung on branch in the early morning light, adorned with glistening dewdrops. in the background beautiful valleys, divine iridescent glowing, opalescent textures, volumetric light, ethereal, sparkling, light inside body, bioluminescence, studio photo, highly detailed, sharp focus, photorealism, photorealism, 8k, best quality, ultra detail, hyper detail, hdr.”

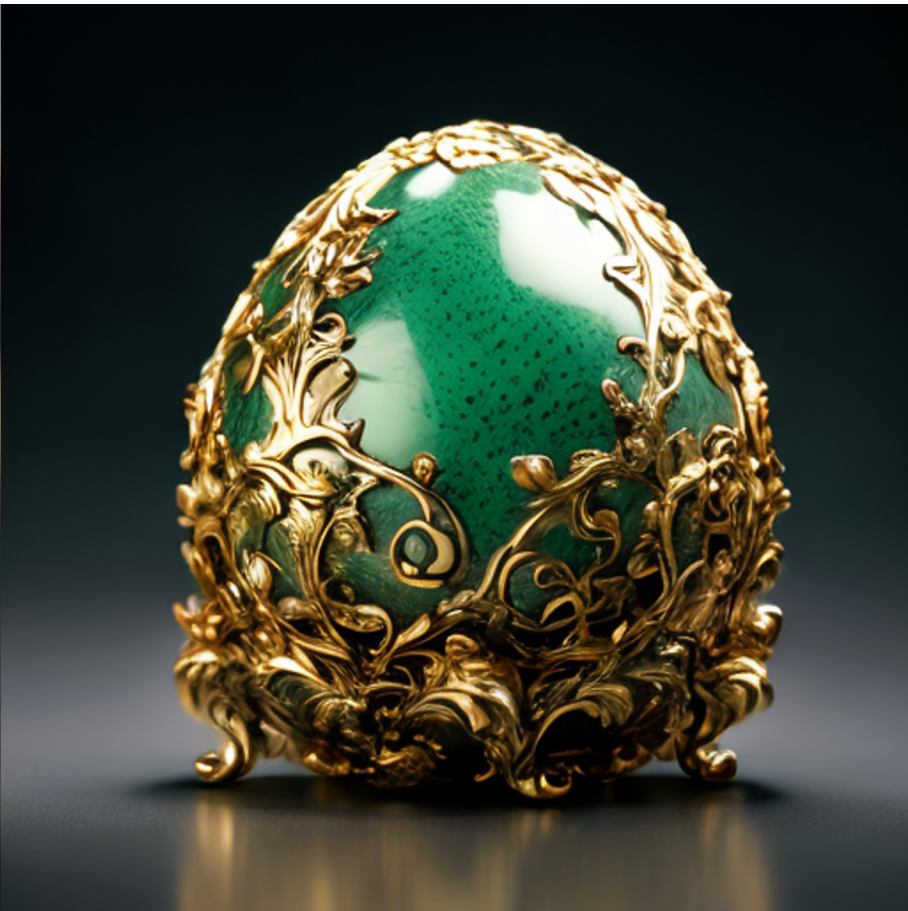

“An image of a jade green and gold coloured Fabergé egg, 16k resolution, highly detailed, product photography, trending on artstation, sharp focus, studio photo, intricate details, fairly dark background, perfect lighting, perfect composition, sharp features, Miki Asai Macro photography, close-up, hyper detailed, trending on artstation, sharp focus, studio photo, intricate details, highly detailed, by greg rutkowski ”
