# Supplementary material
Source: ML conference proceedings conference paper supplement (https://openreview.net/forum?id=ogk236hsJM)
Supplement: supplementary_material [file attachment]

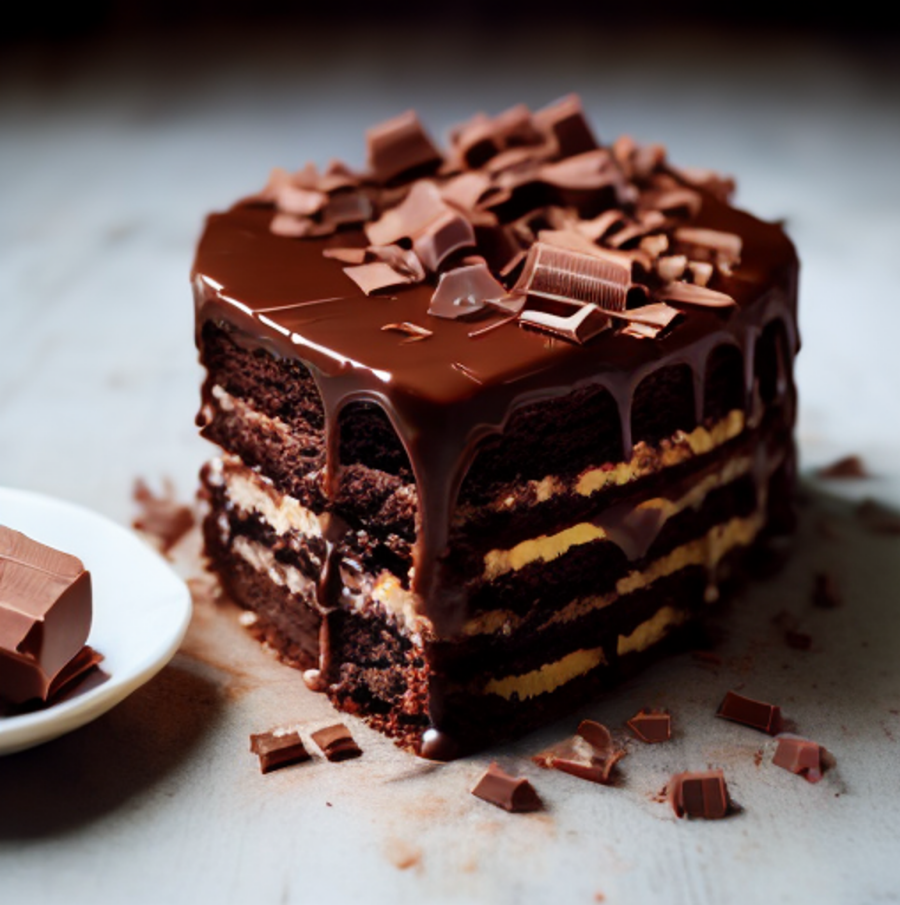

"A *cut chocolate cake*."

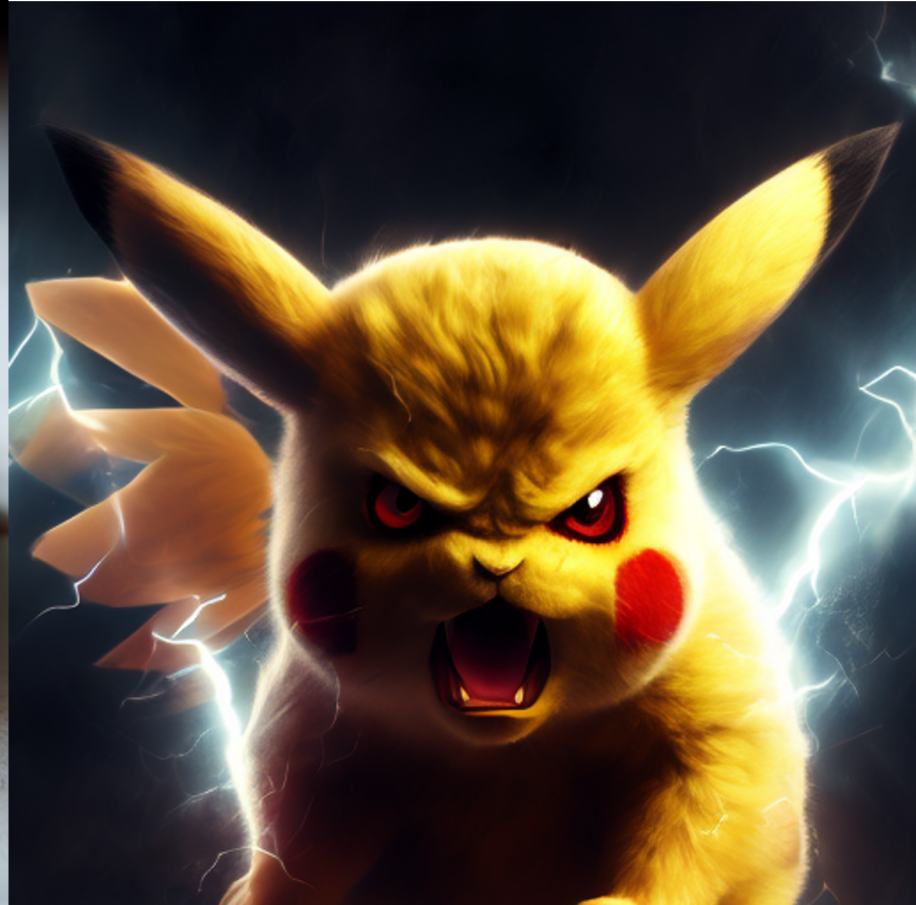

"A *Pikachu* with an *angry expression* and *red eyes*, with *lightning* around it, hyper realistic style."

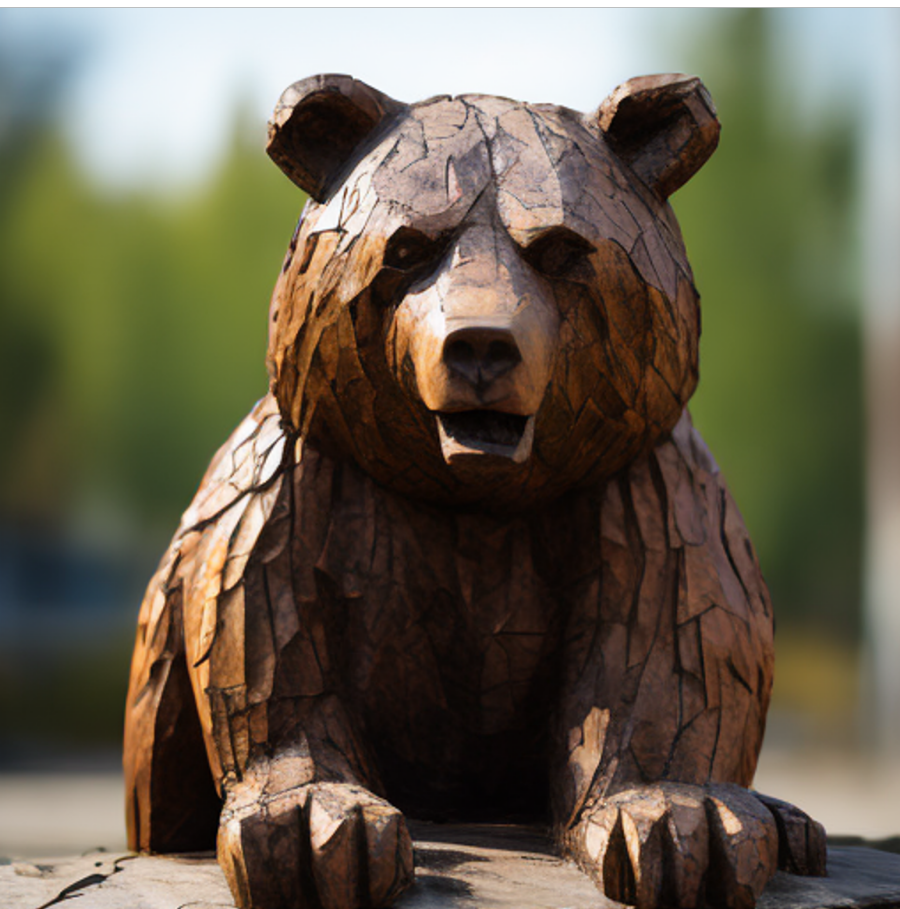

"A *bear sculpture*."

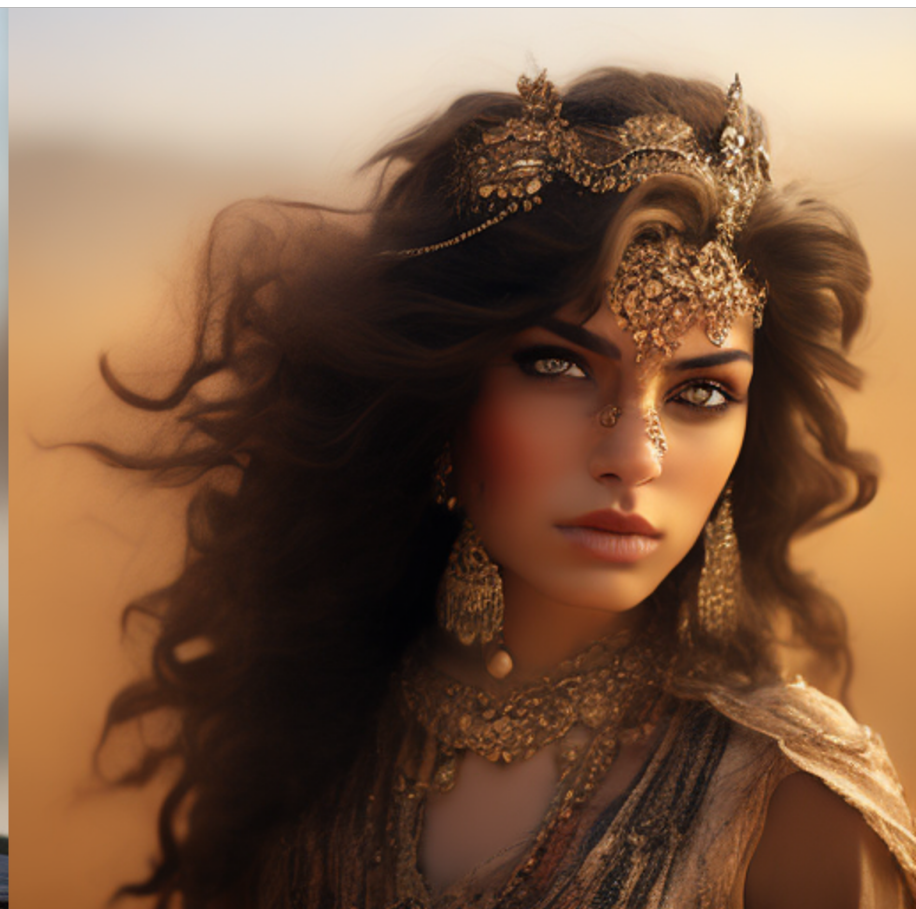

"Closeup portrait of 1 *Persian princess*, royal clothing, makeup, jewelry, wind-blown long hair, symmetric, desert, (sands, dusty and foggy, sand storm, winds) bokeh, *depth of field*, centered4."
