# Supplementary material
Source: ML conference proceedings conference paper supplement (https://openreview.net/forum?id=ogk236hsJM)
Supplement: supplementary_material [file attachment]

Dear Reviewer:

sim_appendix.pdf is the appendix of the submission.

t2i_fullpage_1 – 4.pdf are four more additional high quality images generated by our one-step SIM model.

Hope you enjoy it!

Best,

Authors of Submission #9953.
