# Supplementary material
Source: ML conference proceedings conference paper supplement (https://openreview.net/forum?id=ogk236hsJM)
Supplement: supplementary_material [file attachment]

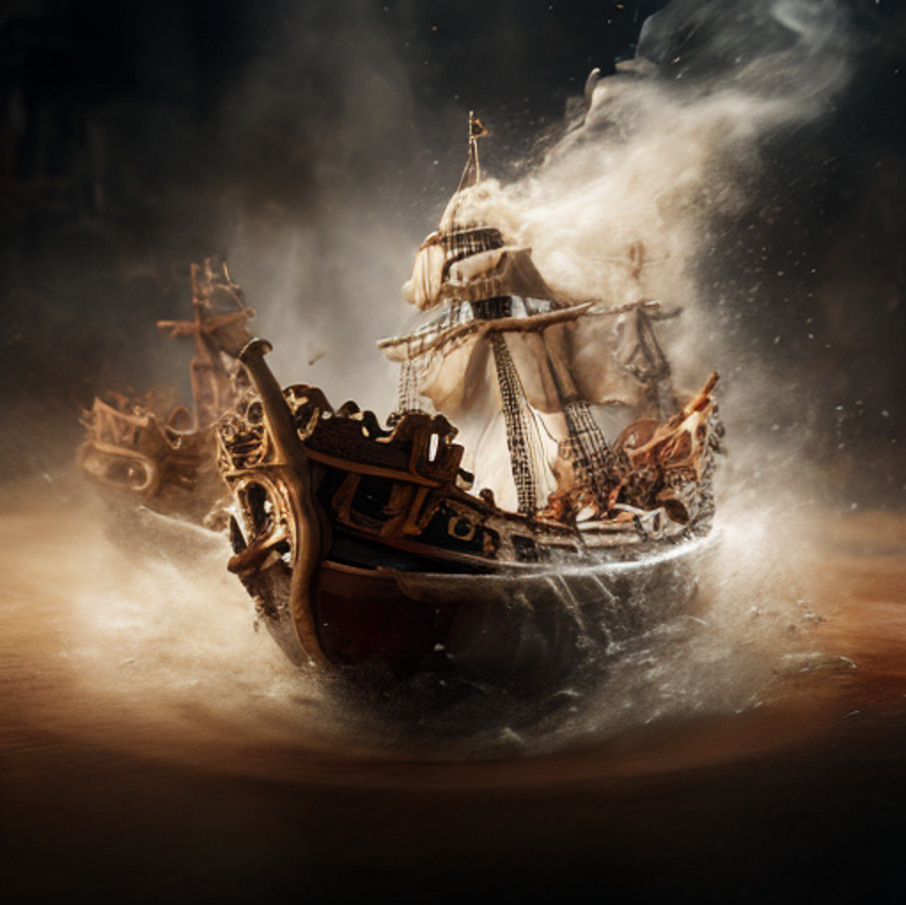

“Photorealistic **closeup** video of **two pirate ships battling** each other as they **sail** inside a cup of **coffee**.”

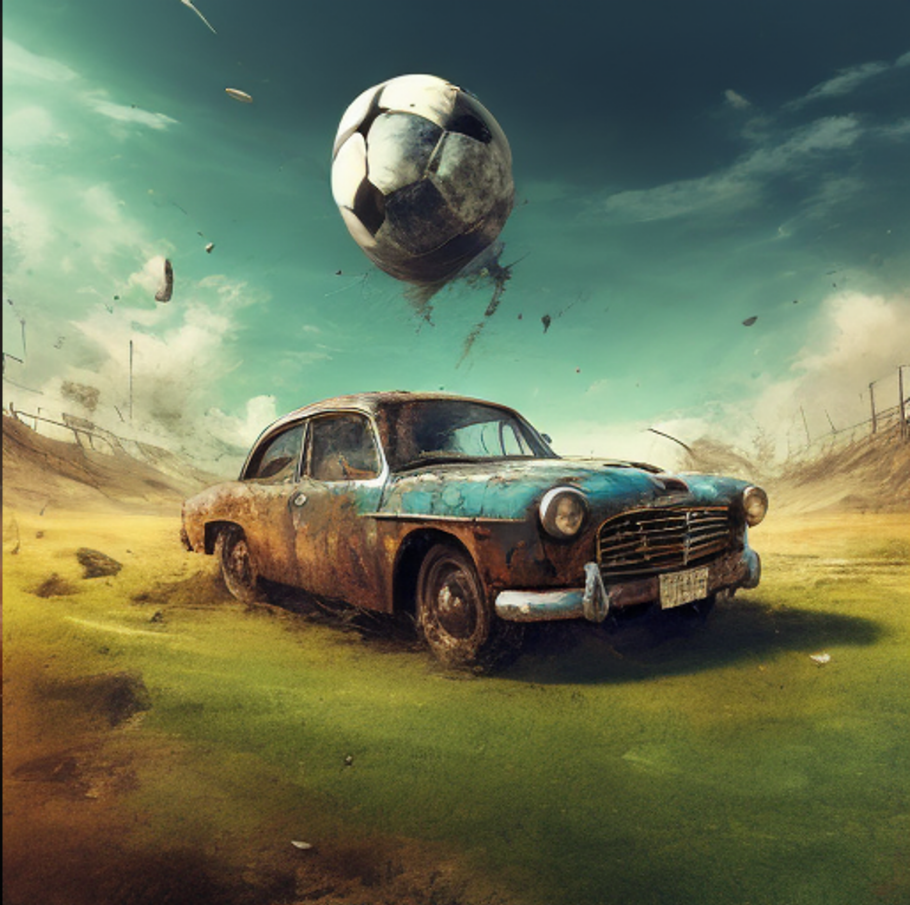

“A **car playing soccer**, digital art.”

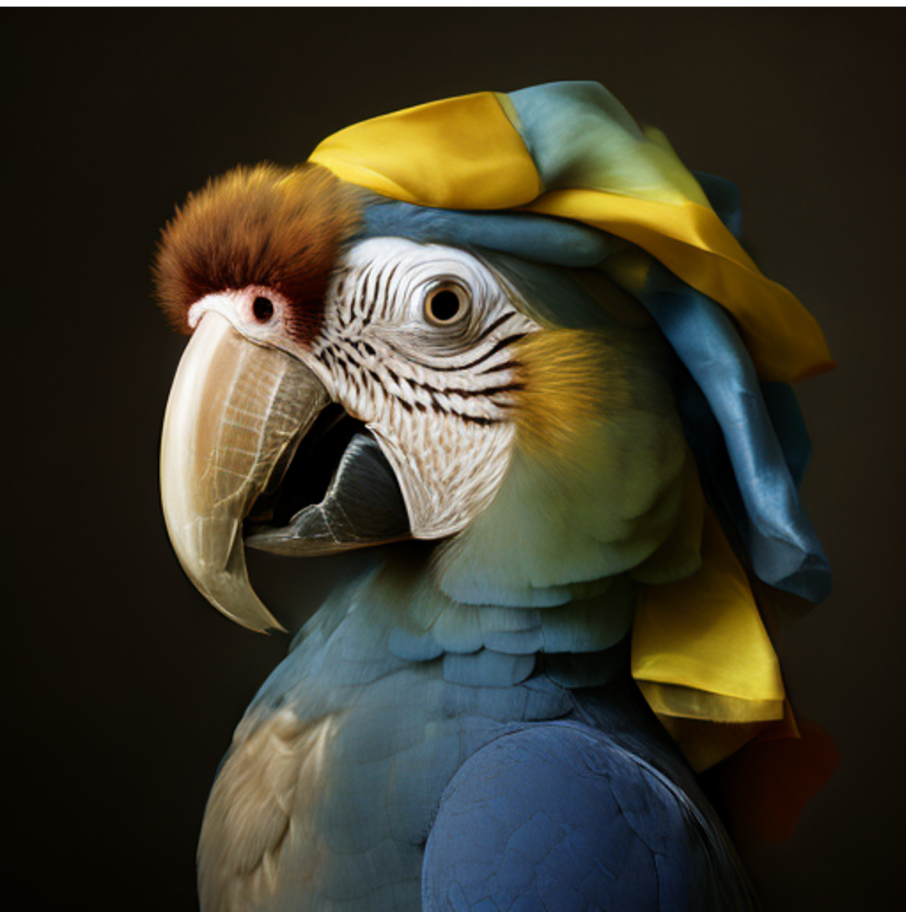

“A **parrot** with a **pearlearring**, Vermeer style.”

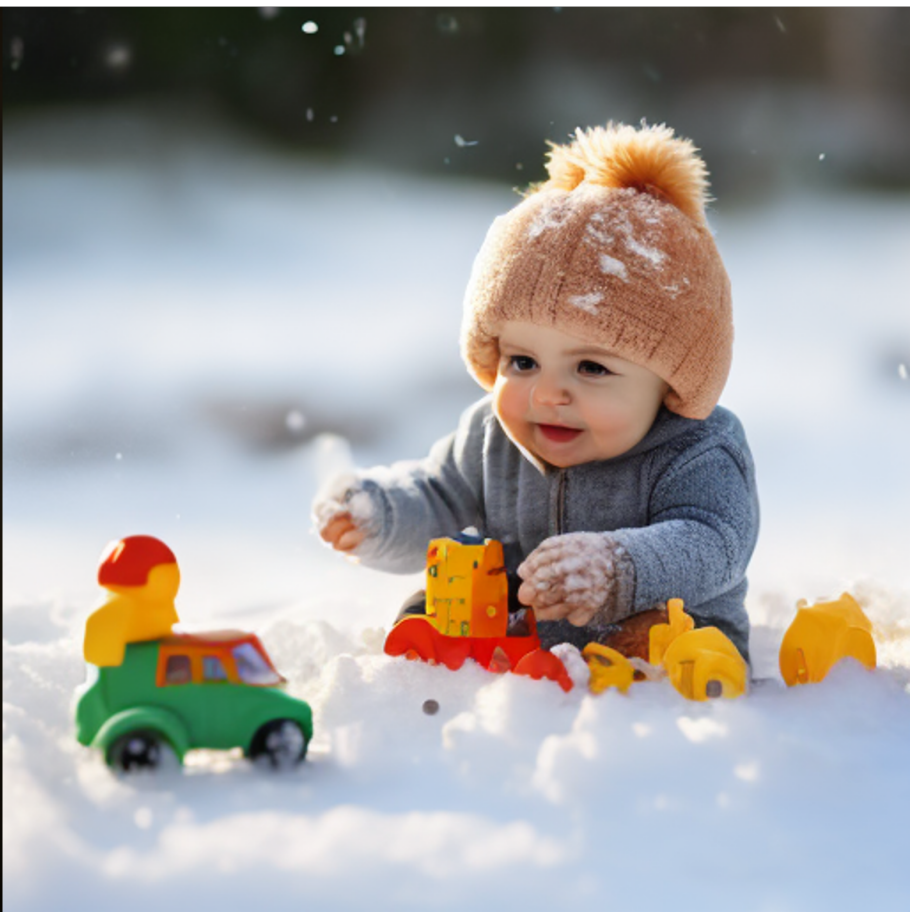

“**Baby** playing with **toys** in the **snow**.”

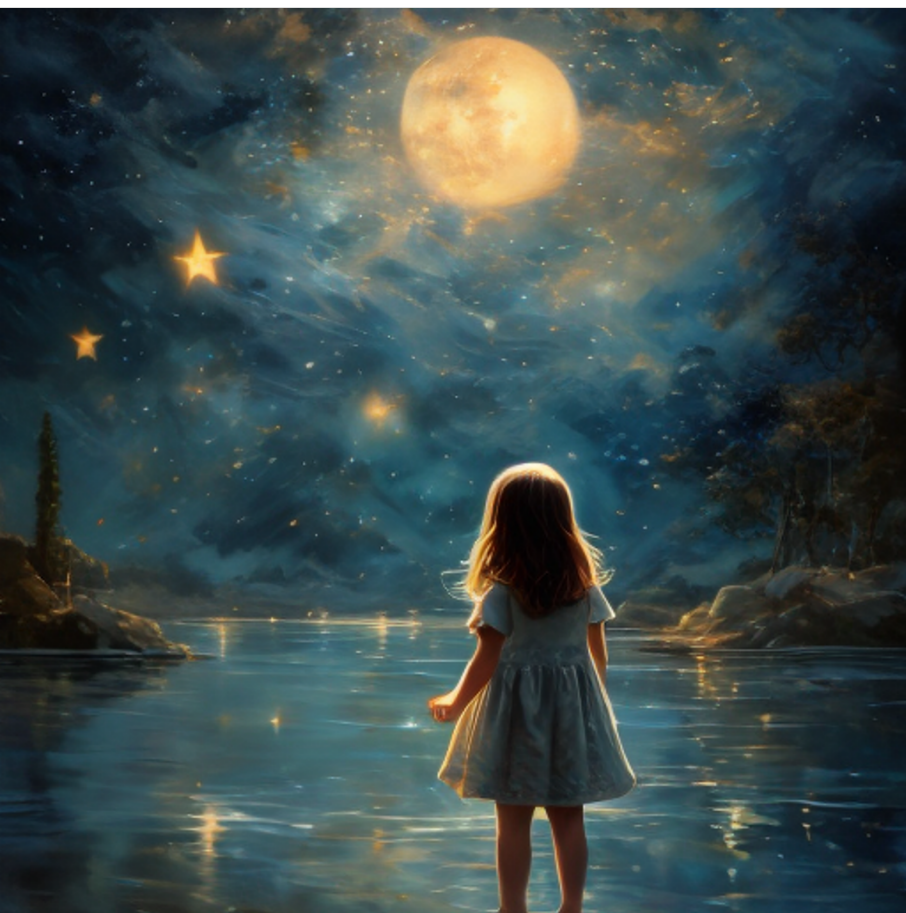

“**Stars, water**, brilliantly, gorgeous **large scale scene**, a **little girl**, in the style of **dreamy realism**.”

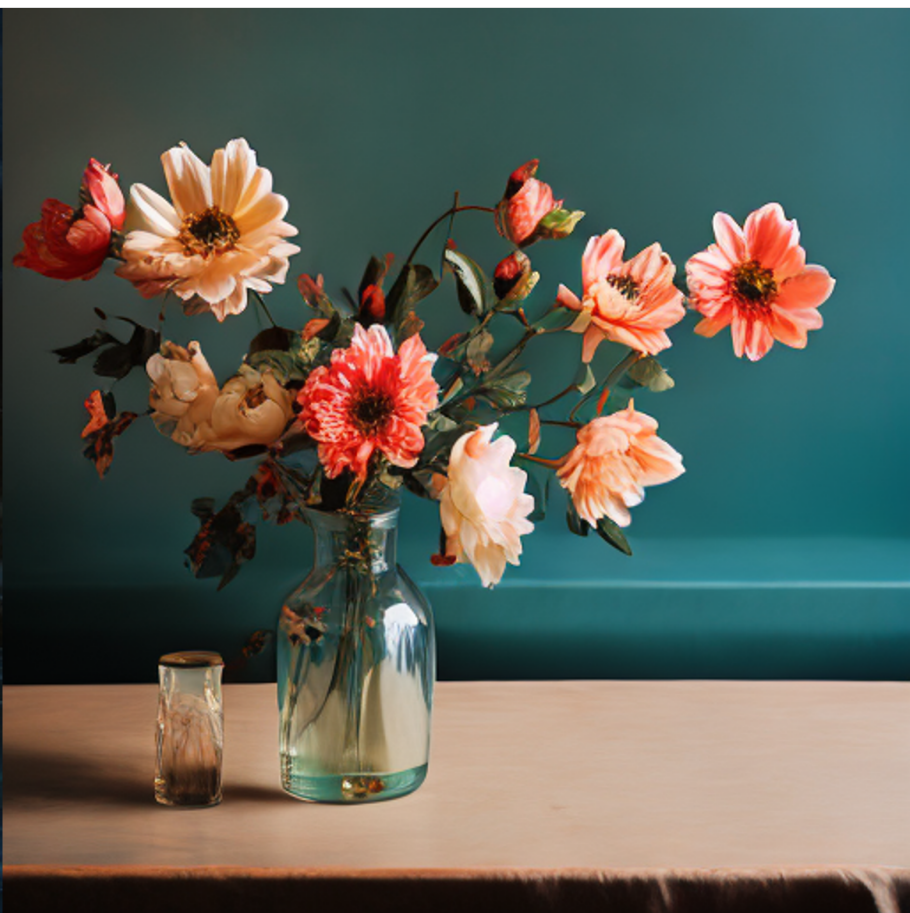

“a **table top** with a **vase** of **flowers** on it.”
